# Supplementary material
Source: MDPI journal article supplement (https://www.mdpi.com/2073-4344/13/7/1044)
Supplement: s1 [file s1]

# Supplementary material

## Electron regulation in Pt-M (M = Cu, Co, and Ni) decorated WO<sub>3</sub> thin films for photocatalytic degradation performance

Jinkang Pan<sup>a,b</sup>, Lihua Zhang<sup>b,c</sup>, Cunxia Wang<sup>b,c</sup>, Kangjie Gao<sup>b,c</sup>, and Pengyu Dong<sup>b,\*</sup>

<sup>a</sup>School of Chemistry and Chemical Engineering, Yancheng Institute of Technology,  
Yancheng 224051, P. R. China.

<sup>b</sup>Key Laboratory for Advanced Technology in Environmental Protection of Jiangsu Province,  
Key Laboratory for Ecological-Environment Materials of Jiangsu Province, Yancheng  
Institute of Technology, Yancheng 224051, P. R. China.

<sup>c</sup>School of Mechanical Engineering, Yancheng Institute of Technology, Yancheng 224051,  
People's Republic of China.

\* Corresponding author.

E-mail address: dongpy11@gmail.com; dongpy11@ycit.edu.cn (P. Dong)

## 1. Synthesis of polymethylmethacrylate (PMMA) spheres

An aqueous suspension of monodispersed PMMA microspheres ( $\varnothing = 450 \pm 5$  nm) was synthesized according to the Schrodin standard technique [1]. The size of the PMMA spheres produced using this method is highly dependent on the composition of the synthesis mixture and the reaction temperature. Briefly, MilliQ water (400 mL) and methyl methacrylate (MMA, 100 mL) were charged into a 4-necked round-bottomed flask (500 mL in volume), equipped with a mechanical stirrer(glass shaft with Teflon stirrer blade), water-cooled reflux condenser, nitrogen bubbler, and a glass quick-fit stopper. The mixture was then heated to 70 °C, whereupon 2,20-azobis (2-methylpropionamidine) dihydrochloride (0.375 g) was added as an azo-initiator and the polymerization of the MMA started. The reaction mixture was maintained at 70 °C for 2 h under vigorous mechanical stirring and then cooled to room temperature over 3–4 h under a nitrogen purge. The resulting colloidal suspensions of PMMA spheres was finally filtered through a glass wool plug to remove large agglomerates and stored in PET bottles for later use.

## 2. Supplementary Figures and Table

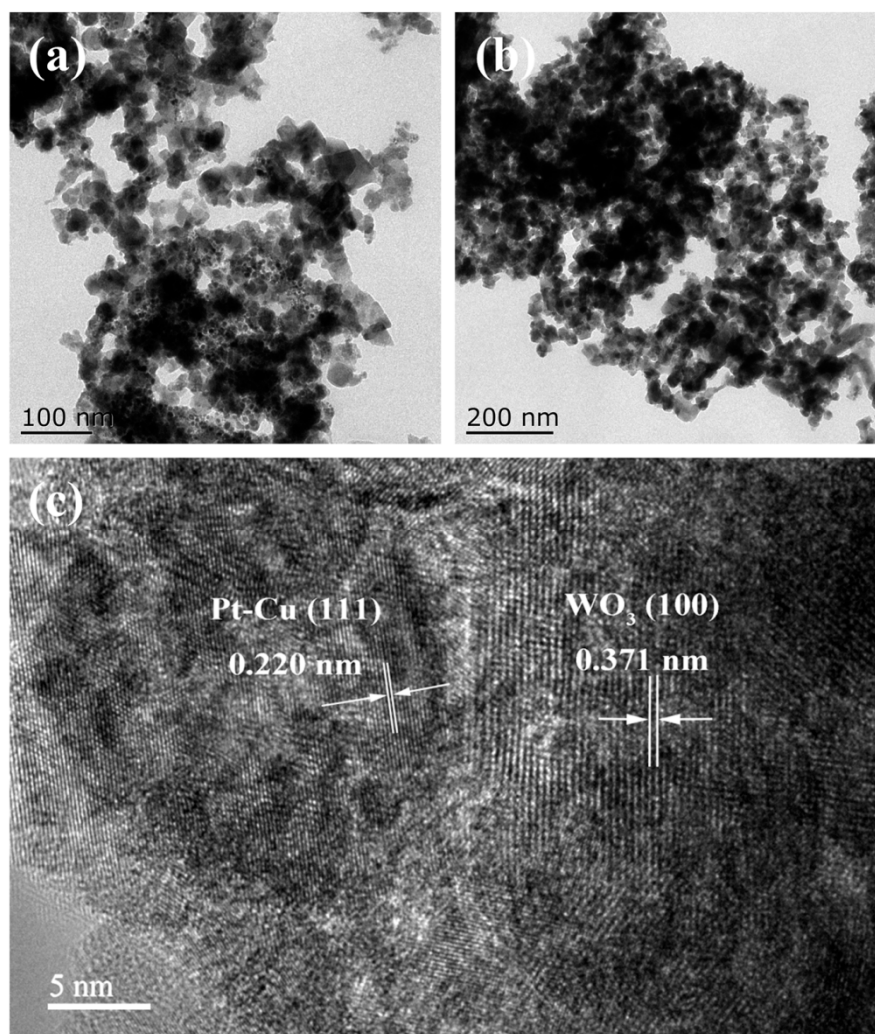

**Figure S1.** (a, b) TEM and (c) HRTEM images of Pt-Cu/WO<sub>3</sub> thin film.

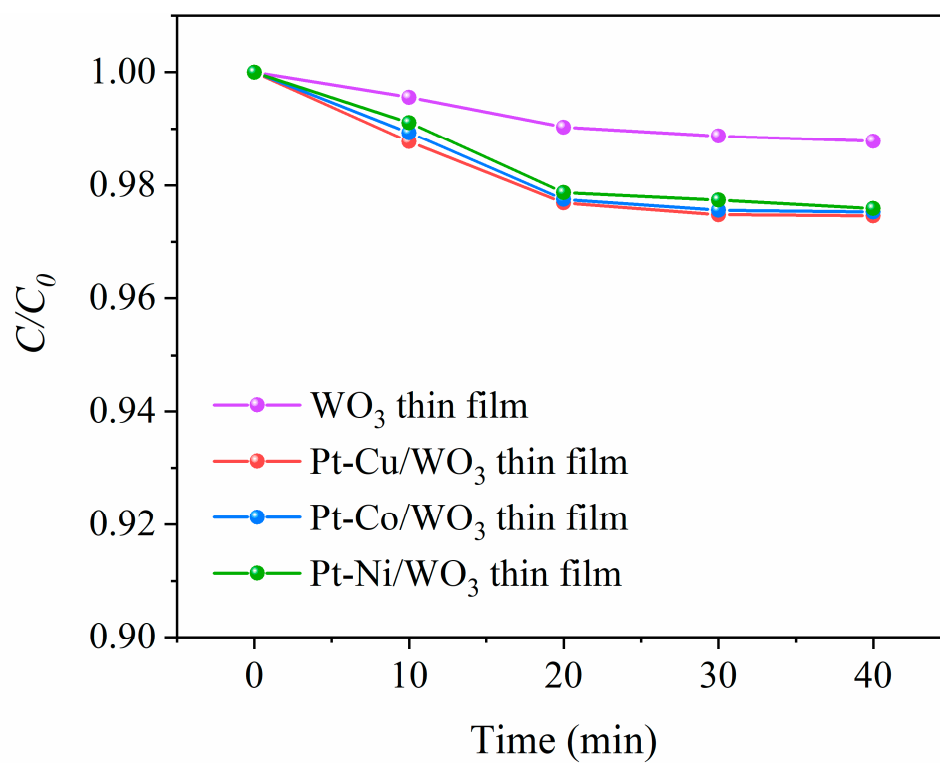

**Figure S2.** The adsorption isotherms of MB in the presence of as-prepared samples under dark conditions.

**Table S1.** Comparison between this research and some commonly used WO<sub>3</sub>-based photocatalysts for the removal of organic pollutants.

| Photocatalyst                                    | Pollutants/Reaction conditions                                                                                                    | Degradation efficiency | Rate constant (min <sup>-1</sup> ) | Ref.      |
|--------------------------------------------------|-----------------------------------------------------------------------------------------------------------------------------------|------------------------|------------------------------------|-----------|
| WO <sub>3</sub>                                  | Methylene blue (MB), C <sub>0</sub> = 5 mg L <sup>-1</sup> , 100 mL, 120 min. Light source: 300 W Xe lamp, 420 nm cut-off filter. | 60 %                   | 0.007                              | This work |
| Pt-Cu/WO <sub>3</sub>                            | MB, C <sub>0</sub> = 5 mg L <sup>-1</sup> , 100 mL, 120 min. Light source: 300 W Xe lamp, 420 nm cut-off filter.                  | 98.9 %                 | 0.040                              | This work |
| Pt-Co/WO <sub>3</sub>                            | MB, C <sub>0</sub> = 5 mg L <sup>-1</sup> , 100 mL, 120 min. Light source: 300 W Xe lamp, 420 nm cut-off filter.                  | 88 %                   | 0.018                              | This work |
| Pt-Ni/WO <sub>3</sub>                            | MB, C <sub>0</sub> = 5 mg L <sup>-1</sup> , 100 mL, 120 min. Light source: 300 W Xe lamp, 420 nm cut-off filter.                  | 90 %                   | 0.019                              | This work |
| FeWO <sub>4</sub> /WO <sub>3</sub>               | MB, C <sub>0</sub> = 10 mg L <sup>-1</sup> , 2 h. Light source: 300 W Xe lamp, 420 nm cut-off filter.                             | 90 %                   | 0.0165                             | [2]       |
| WO <sub>3</sub> -rGO                             | MB, C <sub>0</sub> = 10 mg L <sup>-1</sup> , 15 mL, 180 min. Light source: 300 W Xe lamp, 420 nm cut-off filter.                  | 78 %                   | 0.008                              | [3]       |
| WO <sub>3</sub> -CuS                             | MB, C <sub>0</sub> = 5 mg L <sup>-1</sup> , 250 mL, 60 min. Light source: 300 W Xe lamp, UV cut-off filter.                       | ~ 90 %                 | 0.0288                             | [4]       |
| WO <sub>3</sub> /SiO <sub>2</sub>                | MB, C <sub>0</sub> = 5 mg L <sup>-1</sup> , 120 min, pH 7.5. Light source: 65 W Xe lamp, λ > 420 nm, 125 W/m <sup>2</sup> .       | 91 %                   | 0.013                              | [5]       |
| WO <sub>3</sub> /g-C <sub>3</sub> N <sub>4</sub> | MB, C <sub>0</sub> = 5 mg L <sup>-1</sup> , 10 mL, 210 min. Light source: 65 W Xe lamp, 125 W/m <sup>2</sup> .                    | 97.82 %                | 0.0419                             | [6]       |
| Ag-WO <sub>3</sub>                               | MB, C <sub>0</sub> = 10 mg L <sup>-1</sup> , 50 mL, 50 min. Light source: 300 W Xe lamp.                                          | 88 %                   | —                                  | [7]       |
| In <sub>2</sub> O <sub>3</sub> /WO <sub>3</sub>  | MB, C <sub>0</sub> = 5 mg L <sup>-1</sup> , 50 mL, 90 min. Light source: 500 W Xe lamp, 420 nm cut-off filter.                    | 92.4 %                 | 0.029                              | [8]       |
| TiO <sub>2</sub> -WO <sub>3</sub>                | MB, C <sub>0</sub> = 10 mg L <sup>-1</sup> , 50 mL, 60 min. Light source: 500 W tungsten halogen lamp.                            | 69.8 %                 | 0.0195                             | [9]       |

## References

1. Rick C. Schroden, M.A.-D., Christopher F. Blanford, and Andreas Stein. Optical properties of inverse opal photonic crystals. *Chem. Mater.* **2002**, *14*, 3305–3315.
2. Liu, C.; Lü, H.; Yu, C.; Ding, B.; Ye, R.; Ji, Y.; Dai, B.; Liu, W. Novel FeWO<sub>4</sub>/WO<sub>3</sub> nanoplate with p–n heterostructure and its enhanced mechanism for organic pollutants removal under visible-light illumination. *J. Environ. Chem. Eng.* **2020**, *8*, 104044, doi:10.1016/j.jece.2020.104044.
3. Ibrahim, Y.O.; Gondal, M.A.; Alaswad, A.; Moqbel, R.A.; Hassan, M.; Cevik, E.; Qahtan, T.F.; Dastageer, M.A.; Bozkurt, A. Laser-induced anchoring of WO<sub>3</sub> nanoparticles on reduced graphene oxide sheets for photocatalytic water decontamination and energy storage. *Ceram. Int.* **2020**, *46*, 444–451, doi:10.1016/j.ceramint.2019.08.281.
4. Liu, Y.; Li, M.; Zhang, Q.; Qin, P.; Wang, X.; He, G.; Li, L. One-step synthesis of a WO<sub>3</sub>-CuS nanosheet heterojunction with enhanced photocatalytic performance for methylene blue degradation and Cr(VI) reduction. *J. Chem. Technol. Biotechnol.* **2019**, *95*, 665–674, doi:10.1002/jctb.6247.
5. Sharma, S.; Basu, S. Highly reusable visible light active hierarchical porous WO<sub>3</sub>/SiO<sub>2</sub> monolith in centimeter length scale for enhanced photocatalytic degradation of toxic pollutants. *Sep. Purif. Technol.* **2020**, *231*, 115916, doi:10.1016/j.seppur.2019.115916.
6. Singh, J.; Arora, A.; Basu, S. Synthesis of coral like WO<sub>3</sub>/g-C<sub>3</sub>N<sub>4</sub> nanocomposites for the removal of hazardous dyes under visible light. *J. Alloys Compd.* **2019**, *808*, 151734, doi:10.1016/j.jallcom.2019.151734.
7. Zhang, J.; Fu, X.; Hao, H.; Gan, W. Facile synthesis 3D flower-like Ag@WO<sub>3</sub> nanostructures and applications in solar-light photocatalysis. *J. Alloys Compd.* **2018**, *757*, 134–141, doi:10.1016/j.jallcom.2018.05.068.
8. Xie, R.; Fang, K.; Liu, Y.; Chen, W.; Fan, J.; Wang, X.; Ren, Y.; Song, Y. Z-scheme In<sub>2</sub>O<sub>3</sub>/WO<sub>3</sub> heterogeneous photocatalysts with enhanced visible-light-driven photocatalytic activity toward degradation of organic dyes. *J. Mater. Sci.* **2020**, *55*, 11919–11937, doi:10.1007/s10853-020-04863-5.
9. Prabhu, S.; Cindrella, L.; Kwon, O.J.; Mohanraju, K. Photoelectrochemical and photocatalytic activity of TiO<sub>2</sub>-WO<sub>3</sub> heterostructures boosted by mutual interaction. *Mater. Sci. Semicond. Process.* **2018**, *88*, 10–19, doi:10.1016/j.mssp.2018.07.028.
